# Supplementary material
Source: Springer Nature journal article supplement (https://www.springermedizin.de/resource/supplementary/12985_2010_878_MOESM2_ESM.pdf/9608648)

1

2

3

4

His- $\sigma$ B

His

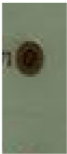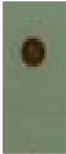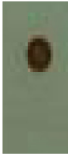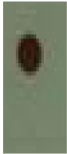

Supplement: MOESM2 [file 9608648]
